# Supplementary material for: Validity of the iLOAD® app for resistance training monitoring
Source: PeerJ. 2019 Aug 7;7:e7372. doi: 10.7717/peerj.7372 (PMC6689219; doi:10.7717/peerj.7372)
Supplement: Supplemental Information 1 — Data used for statistical analysis [file peerj-07-7372-s001.xlsx]

## Sheet: Database
			First set			Second set			Third set			First set		Second set		Third set
ID	Mass	Load	MV encoder (m/s)	MV R1 (m/s)	MV R2 (m/s)	MV encoder (m/s)	MV R1 (m/s)	MV R2 (m/s)	MV encoder (m/s)	MV R1 (m/s)	MV R2 (m/s)	Total work encoder (J)	Total work APP (J)	Total work Encoder (J)	Total work APP (J)	Total work Encoder (J)	Total work APP (J)
1	71.35	105	0.374	0.340064	0.350301	0.445	0.301176	0.318725	0.382	0.390959	0.411047	9306.03	10294.1	5560.64	6433.8	5468.73	6433.8
2	75.5	97	0.341	0.318501	0.309513	0.309	0.225352	0.226667	0.317	0.275081	0.277551	15397.5	13997.8	15430.9	13997.8	16197.4	13997.8
3	91.15	117	0.323	0.339375	0.342146	0.306	0.316661	0.30888	0.265	0.263315	0.256037	20236.7	20786.2	20714.6	20786.2	19424.4	20786.2
4	75.55	111	0.323	0.365726	0.328022	0.336	0.339971	0.339641	0.316	0.312082	0.318182	5703.81	5055.4	5242.23	5055.4	5308.17	5055.4
5	57.2	77	0.30125	0.277136	0.262104	0.2801	0.277136	0.257235	0.28545	0.279178	0.280374	16323.8	16459.6	16634.5	16459.6	17153	16459.6
6	66	59	0.2272	0.205	0.212656	0.2548	0.195844	0.195938	0.24825	0.208175	0.203323	15911	17158.9	16111.5	17158.9	15309.3	17158.9
7	51.4	39	0.351	0.253583	0.241851	0.3317	0.241978	0.243644	0.3454	0.247578	0.262258	14218.3	16209.8	14380.4	16209.8	13894.1	16209.8
8	60.25	37	0.216165	0.185709	0.191427	0.221667	0.168088	0.169256	0.25116	0.205449	0.201666	15252.1	16293.1	15252.1	16293.1	15455.8	16293.1
9	74	121	0.4362	0.464576	0.447177	0.4248	0.465658	0.452745	0.43075	0.427807	0.437637	11231	11962	10466.8	11962	10848.9	11962
10	69	67	0.51505	0.439791	0.4811	0.47585	0.428135	0.435459	0.64145	0.556291	0.516923	16142.7	14500.7	12688.1	11600.5	15993.4	14500.7
11	86.5	107	0.4115	0.391892	0.383429	0.38766	0.395995	0.401292	0.35875	0.302714	0.306122	19524	19426.9	20179.7	19426.9	19791.2	19426.9
12	81	111	0.29655	0.266435	0.265589	0.29105	0.25996	0.262332	0.3345	0.311126	0.308518	5226.6	5402.78	4768.54	4862.5	5273.59	5402.78
13	67.95	111	0.3106	0.292776	0.293333	0.30275	0.282051	0.286565	0.2887	0.285185	0.290676	12526.1	12526.1	12694.2	12526.1	12480.3	12526.1
14	87.15	81	0.5569	0.562588	0.571837	0.57145	0.580552	0.552105	0.55385	0.543478	0.523218	23877.7	21880	23283.2	21880	22712.4	21880
15	75.5	107	0.40765	0.421546	0.4273	0.3618	0.421299	0.408395	0.3881	0.414031	0.411899	13091.3	14010.8	14251.6	14010.8	13879.4	14010.8
16	89.9	97	0.227813	0.257916	0.256734	0.1728	0.1649	0.164706	0.164803	0.166274	0.166468	21150.8	22643.1	20558.9	22643.1	20842	22643.1
